# Supplementary material for: Antifungal Activity of Essential Oil ofEucalyptus camaldulensisDehnh. against SelectedFusariumspp.
Source: Hindawi journal article supplement (doi:10.1155/2017/8761610), 2017-01-01
Supplement: f1 [file 8761610.f1.pdf]

**Compounds identified from the essential oil of *Eucalyptus camaldulensis* Dehnh.**

| <b>No<sup>b</sup></b> | <b>RT (min)</b> | <b>Compound Name</b>                       | <b>RI<sup>b</sup></b> | <b>Concentration mean (%) ±SE</b> |
|-----------------------|-----------------|--------------------------------------------|-----------------------|-----------------------------------|
| 1                     | 4.427           | Isopentyl formate                          | 714                   | 1.1±0.01                          |
| 2                     | 6.211           | 2,4-dimethyl-3-Pentanone                   | 779                   | 0.3±0.02                          |
| 3                     | 9.411           | 2-methylpropyl- 2-methylpropanoate         | 903                   | 0.9±0.01                          |
| 4                     | 9.838           | α-Pinene                                   | 922                   | 15.6±0.18                         |
| 5                     | 10.054          | Camphene                                   | 932                   | 1.8±0.01                          |
| 6                     | 10.645          | β-Pinene                                   | 958                   | 4.6±0.04                          |
| 7                     | 10.961          | Myrcene                                    | 972                   | 0.6±0.02                          |
| 8                     | 11.224          | α-Phellandrene                             | 984                   | 10.0±0.11                         |
| 9                     | 11.476          | δ-2-Carene                                 | 996                   | 0.2±0.02                          |
| 10                    | 11.669          | p-Cymene                                   | 1006                  | 8.1±0.08                          |
| 11                    | 11.809          | 1,8-Cineole                                | 1014                  | 16.2±0.19                         |
| 12                    | 12.037          | (E)-β- Ocimene                             | 1028                  | 0.2±0.02                          |
| 13                    | 12.143          | dihydro-Tagetone                           | 1034                  | 0.2±0.02                          |
| 14                    | 12.277          | γ-Terpinene                                | 1042                  | 4.4±0.03                          |
| 15                    | 12.500          | 2,6-dimethyl-3,5-Heptanedione              | 1056                  | 0.4±0.02                          |
| 16                    | 12.739          | Terpinolene                                | 1070                  | 1.9±0.01                          |
| 17                    | 12.777          | α-Terpinene                                | 1317                  | 0.5±0.02                          |
| 18                    | 12.915          | 3,7-dimethyl-1,6-Octadien-3-ol             | 1081                  | 0.5±0.02                          |
| 19                    | 12.997          | 3-methyl-Butanoic acid-3-methylbutyl ester | 1086                  | 0.6±0.02                          |
| 20                    | 13.044          | n-Amyl isovalerate                         | 1089                  | 0.4±0.02                          |
| 21                    | 13.190          | endo-Fenchol                               | 1098                  | 1.6±0.01                          |
| 22                    | 13.377          | 2,6-dimethyl-2,4,6-Octatriene              | 1109                  | 1.4±0.01                          |
| 23                    | 13.634          | (E) - Pinocarviol                          | 1124                  | 2.3±0.01                          |
| 24                    | 13.699          | Camphor                                    | 1128                  | 0.3±0.02                          |
| 25                    | 13.757          | Camphene hydrate                           | 1131                  | 0.3±0.02                          |
| 26                    | 13.980          | Pinocarvone                                | 1144                  | 0.8±0.01                          |
| 27                    | 14.079          | Borneol                                    | 1150                  | 2.9±0.01                          |
| 28                    | 14.237          | Terpinen-4-ol                              | 1159                  | 2.0±0.01                          |
| 29                    | 14.483          | α-Terpineol                                | 1174                  | 4.4±0.03                          |
| 30                    | 14.541          | Myrtenol                                   | 1177                  | 0.9±0.01                          |
| 31                    | 14.834          | (E)-Carveol                                | 1194                  | 0.5±0.02                          |
| 32                    | 15.155          | Cumin aldehyde                             | 1215                  | 0.3±0.02                          |
| 33                    | 15.202          | Carvone                                    | 1218                  | 0.2±0.02                          |
| 34                    | 15.267          | Carvotanacetone                            | 1222                  | 0.6±0.02                          |
| 35                    | 15.840          | (E)- Isosafrole                            | 1261                  | 0.3±0.02                          |
| 36                    | 15.980          | Carvacrol                                  | 1270                  | 0.7±0.02                          |
| 37                    | 16.536          | 1,5,5-Trimethyl-6-methylene-cyclohexene    | 1308                  | 0.5±0.02                          |
| 38                    | 17.033          | Isoledene                                  | 1343                  | 0.2±0.02                          |
| 39                    | 17.080          | α-Copaene                                  | 1347                  | 0.3±0.02                          |
| 40                    | 17.361          | Methyl eugenol                             | 1367                  | 0.3±0.02                          |

|    |        |                      |      |                |
|----|--------|----------------------|------|----------------|
| 41 | 17.548 | $\alpha$ -Gurjunene  | 1380 | 0.6 $\pm$ 0.02 |
| 42 | 17.700 | (E)-Caryophyllene    | 1391 | 1.6 $\pm$ 0.01 |
| 43 | 17.788 | $\beta$ -Gurjunene   | 1398 | 0.2 $\pm$ 0.02 |
| 44 | 17.952 | $\beta$ -Selinene    | 1410 | 1.0 $\pm$ 0.01 |
| 45 | 18.233 | $\alpha$ -Guaiene    | 1432 | 0.7 $\pm$ 0.01 |
| 46 | 18.350 | Zonarene             | 1441 | 0.3 $\pm$ 0.02 |
| 47 | 18.572 | $\Delta$ -Selinene   | 1458 | 0.5 $\pm$ 0.02 |
| 48 | 18.654 | Viridiflorene        | 1464 | 1.1 $\pm$ 0.01 |
| 49 | 18.859 | $\gamma$ - Muurolene | 1480 | 0.2 $\pm$ 0.02 |
| 50 | 18.952 | $\delta$ -Cadinene   | 1487 | 0.5 $\pm$ 0.02 |
| 51 | 19.555 | $\gamma$ -Eudesmol   | 1536 | 0.3 $\pm$ 0.03 |
| 52 | 19.672 | Spathulenol          | 1546 | 0.7 $\pm$ 0.02 |
| 53 | 19.754 | Globulol             | 1553 | 0.7 $\pm$ 0.01 |
| 54 | 20.093 | iso-Leptospermone    | 1581 | 2.2 $\pm$ 0.01 |

---

<sup>b</sup>No = Peak numbers

<sup>b</sup>RI = Retention index

SE = Standard error of the mean
